# Supplementary material
Source: PubMed Central journal article supplement (PMC5954999)
Supplement: NIHMS963100-supplement-Suppl_Fig_S1.pdf [file NIHMS963100-supplement-Suppl_Fig_S1.pdf]

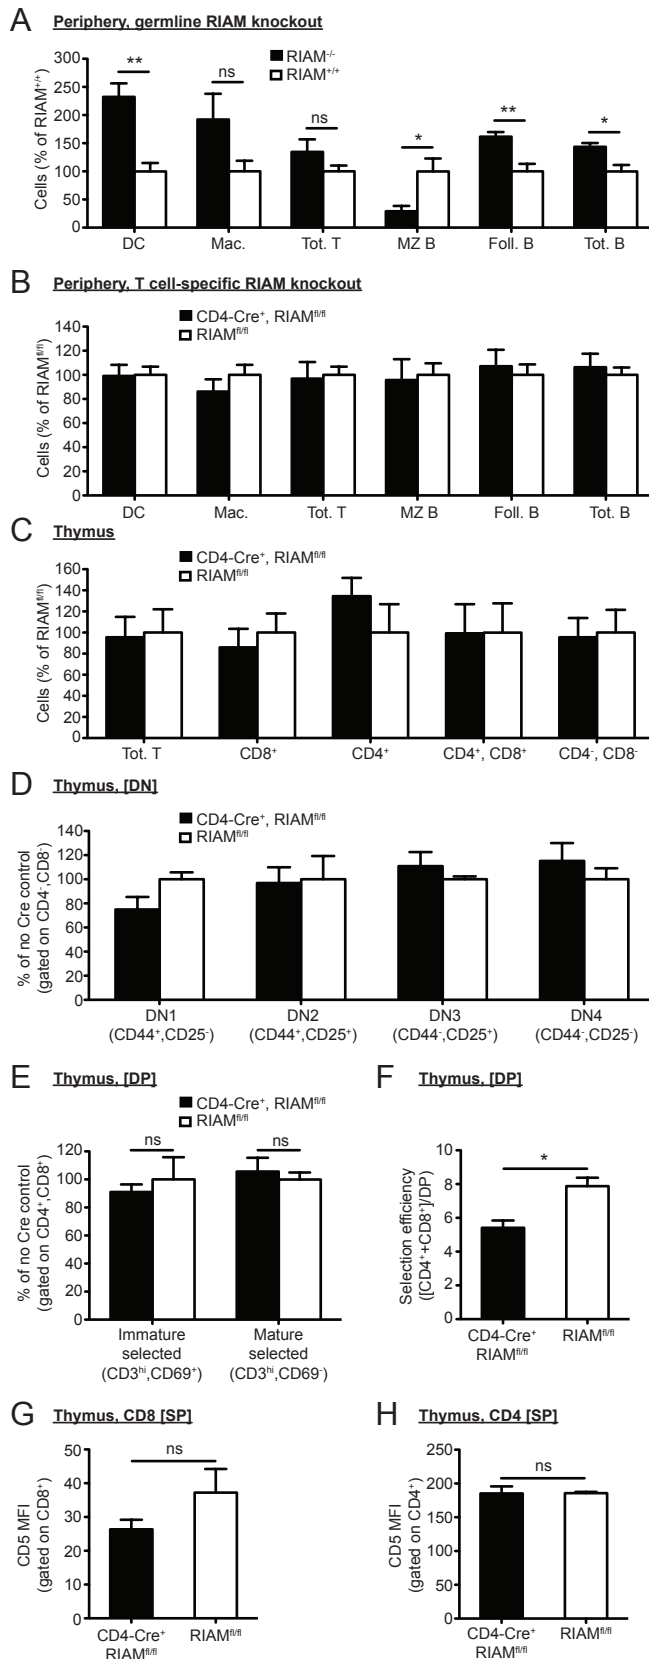

**SUPPLEMENTAL FIGURE 1. Characterization of leukocyte subsets.** (A-B) *Leukocyte compartmentalization in spleen.* Splenocytes were stained with specific antibodies for T cells (CD3, CD4 or CD8), dendritic cells (CD11c<sup>+</sup>, CD11b<sup>+</sup>), macrophages (CD11b<sup>+</sup>, CD11c), total B cells (B220<sup>+</sup>), follicular B cells (CD23<sup>hi</sup>, CD35<sup>hi</sup>), and marginal zone B cells (CD23<sup>lo</sup>, CD35<sup>lo</sup>) for flow cytometric analysis. Data are mean  $\pm$  SEM from two pooled independent experiments; n=3-5 mice per group each time. (A) *Germline RIAM knockout mice.* (B) *T cell-specific conditional RIAM knockout mice.* (C-H) *T cell development in thymus of T cell-specific conditional RIAM knockout mice.* Thymic T cell subsets from CD4-Cre<sup>+</sup>, RIAM<sup>fl/fl</sup> mice and control RIAM<sup>fl/fl</sup> littermates were identified by staining for the indicated combinations of markers with antibodies specific for CD3, CD4, CD8, CD44, CD69, and CD5, and analyzed by flow cytometry; n=3 per group. No significant differences were observed, except in selection efficiency, as indicated. (C) *Gross subset cellularity.* (D) *Double negative [DN] subsets.* (E) *Double-positive [DP] subsets.* (F) *Selection efficiency.* (G-H) *CD5 levels on CD8 and CD4 single-positive [SP] subsets.*
